# Supplementary material for: Nitrogen-doped carbon with mesoporous structure as high surface area catalyst support for methanol oxidation reaction
Source: Royal Society of Chemistry journal article supplement (doi:10.1039/c6ra06104d), 2016-01-01
Supplement: c6ra06104d1.pdf [file c6ra06104d1.pdf]

## Supporting Information

### Nitrogen-doped Carbon with Mesoporous Structure as High Surface Area Catalyst Support for Methanol Oxidation Reaction

Li-Mei Zhang <sup>a</sup>, Zhen-Bo Wang <sup>a\*</sup>, Xu-Lei Sui <sup>a</sup>, Cun-Zhi Li <sup>a,b</sup>, Lei Zhao <sup>a</sup>, Da-Ming Gu <sup>b</sup>

<sup>a</sup> School of Chemical Engineering and Technology, Harbin Institute of Technology, No. 92 West-Da Zhi Street,  
Harbin, 150001 China

<sup>b</sup> School of Science, Harbin Institute of Technology, No. 92 West-Da Zhi Street, Harbin, 150001 China

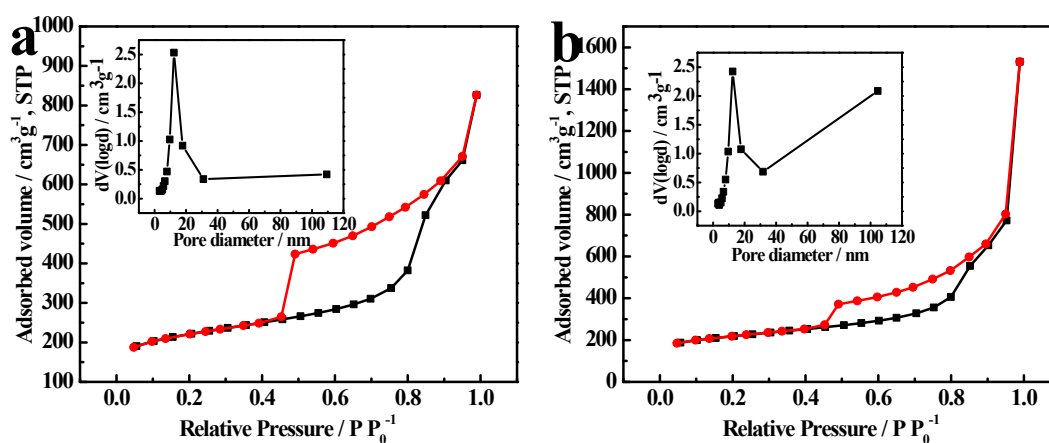

Fig. S1 N<sub>2</sub> adsorption-desorption isotherms and the pore size distribution from the BJH method (inset) of MNC-

1/3 (a) and MNC-1/9 (b)

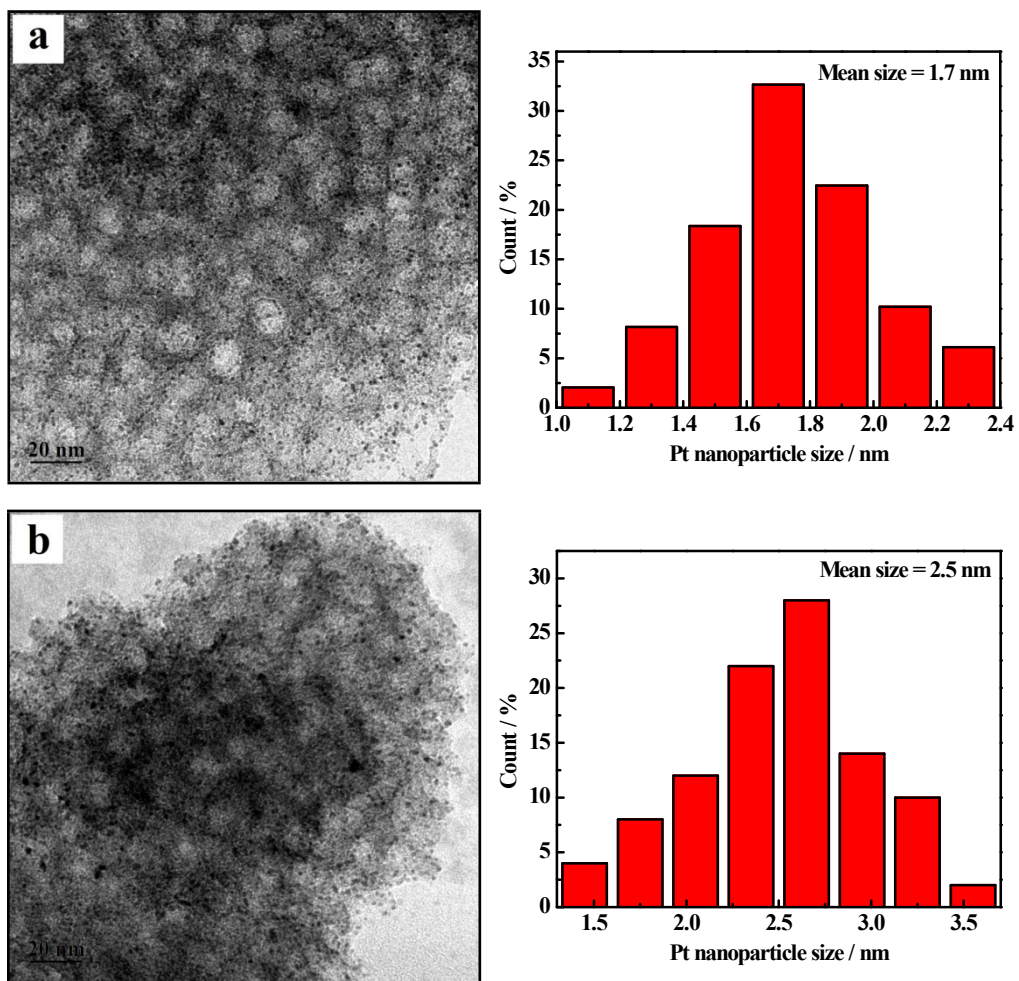

Fig. S2 TEM images and Pt size distribution (statistic number 100) of Pt/MNC-1/3 catalyst (a) and Pt/MNC-1/9 catalyst (b)

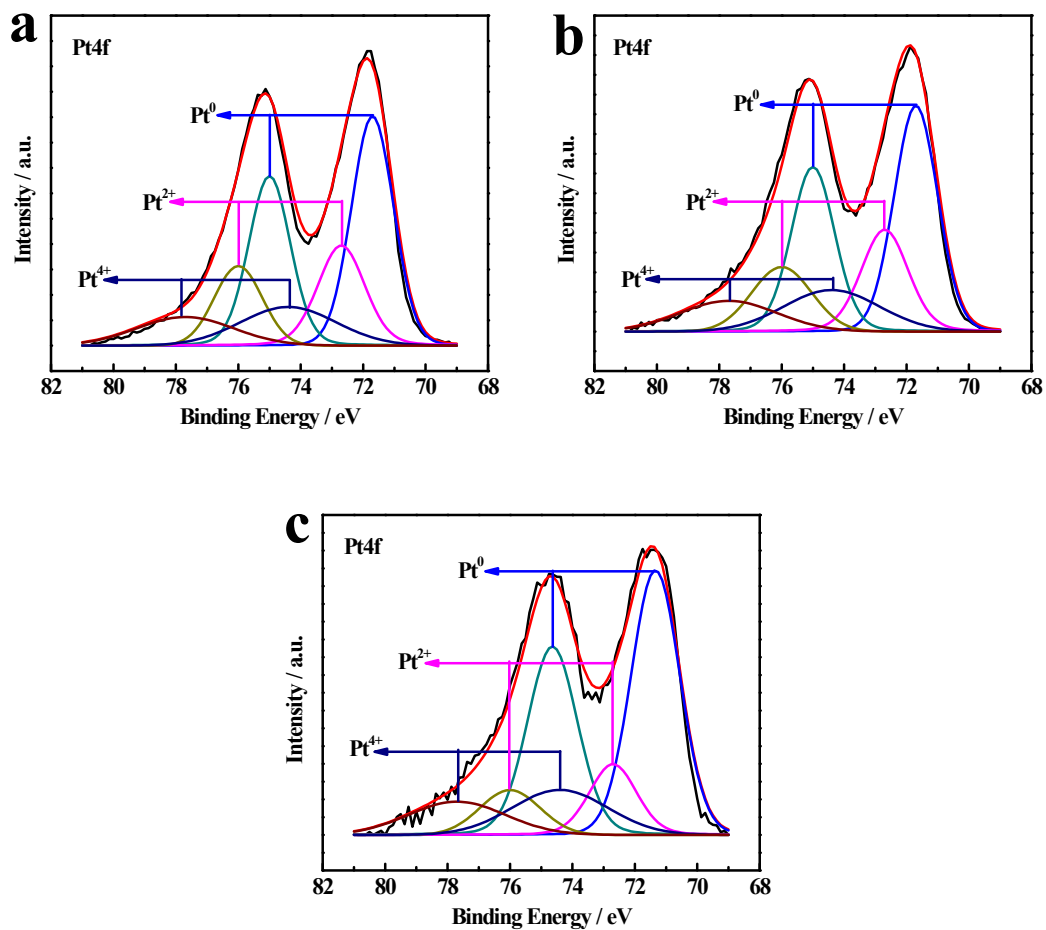

Fig. S3 the high resolution XPS spectra of Pt 4f for Pt/CNx catalyst (a), Pt/MNC-1/3 catalyst (b) and Pt/MNC-1/9 catalyst (c)

Table S1 Surface areas, pore volumes and Pore diameters of CNx and MNC supports

| Sample  | BET surface area (m <sup>2</sup> g <sup>-1</sup> ) | Micropore surface area (m <sup>2</sup> g <sup>-1</sup> ) | Mesoporous surface area (m <sup>2</sup> g <sup>-1</sup> ) | Pore volume (cm <sup>3</sup> g <sup>-1</sup> ) | Pore diameter |
|---------|----------------------------------------------------|----------------------------------------------------------|-----------------------------------------------------------|------------------------------------------------|---------------|
| CNx     | 278                                                | 278                                                      | -                                                         | 0.1                                            | 31.0          |
| MNC-1/3 | 713                                                | 387                                                      | 326                                                       | 1.0                                            | 12.3          |
| MNC-1/6 | 728                                                | 361                                                      | 367                                                       | 1.3                                            | 12.5          |
| MNC-1/9 | 714                                                | 331                                                      | 383                                                       | 2.2                                            | 12.4          |

Table S2 the distribution proportion of different types Pt of Pt4f

| Sample     | Pt species       | Binding energy/eV | Relative ratio/% |
|------------|------------------|-------------------|------------------|
| Pt/CNx     | Pt <sup>0</sup>  | 71.9              | 51.56            |
|            | Pt <sup>2+</sup> | 72.7              | 28.45            |
|            | Pt <sup>4+</sup> | 74.4              | 20.00            |
| Pt/MNC-1/3 | Pt <sup>0</sup>  | 71.8              | 51.40            |
|            | Pt <sup>2+</sup> | 72.7              | 27.54            |
|            | Pt <sup>4+</sup> | 74.4              | 21.07            |
| Pt/MNC-1/6 | Pt <sup>0</sup>  | 71.7              | 52.90            |
|            | Pt <sup>2+</sup> | 72.7              | 23.61            |
|            | Pt <sup>4+</sup> | 74.4              | 23.48            |
| Pt/MNC-1/9 | Pt <sup>0</sup>  | 71.3              | 60.41            |
|            | Pt <sup>2+</sup> | 72.7              | 16.82            |
|            | Pt <sup>4+</sup> | 74.4              | 22.78            |
